# Supplementary material
Source: PubMed Central journal article supplement (PMC3281726)
Supplement: supp_M111.304311_Supplement_JBC_2011_304311R2.pdf [file supp_M111.304311_Supplement_JBC_2011_304311R2.pdf]

## Supplemental Data

Table S1 Composition of the chemical defined medium (CDM) for *S. pneumoniae*

| Compound                                                          | CDM [mg/l] |
|-------------------------------------------------------------------|------------|
| FeSO <sub>4</sub> ·7H <sub>2</sub> O                              | 5.04       |
| Fe(NO <sub>3</sub> ) <sub>2</sub> ·9H <sub>2</sub> O              | 1.06       |
| K <sub>2</sub> HPO <sub>4</sub>                                   | 200        |
| KH <sub>2</sub> PO <sub>4</sub>                                   | 500        |
| MgSO <sub>4</sub> ·7H <sub>2</sub> O                              | 700        |
| MnSO <sub>4</sub>                                                 | 5.58       |
| L-Alanine                                                         | 100        |
| L-Arginine                                                        | 100        |
| L-Aspartic acid                                                   | 100        |
| L-Asparagine                                                      | 100        |
| L-Cysteine                                                        | 500        |
| L-Cystine                                                         | 50         |
| L-Glutamic acid                                                   | 100        |
| L-Glutamine                                                       | 200        |
| Glycine                                                           | 100        |
| L-Histidine                                                       | 100        |
| L-Isoleucine                                                      | 100        |
| L-Leucine                                                         | 100        |
| L-Lysine                                                          | 100        |
| L-Methionine                                                      | 100        |
| L-Phenylalanine                                                   | 100        |
| L-Proline                                                         | 100        |
| Hydroxy-L-Proline                                                 | 100        |
| L-Serine                                                          | 100        |
| L-Threonine                                                       | 200        |
| L-Tryptophan                                                      | 100        |
| L-Tyrosine                                                        | 100        |
| L-Valine                                                          | 100        |
| p-Aminobenzoic acid                                               | 0.2        |
| Biotin                                                            | 0.2        |
| Folic acid                                                        | 0.8        |
| Niacinamide                                                       | 1          |
| β-Nicotinamide adenine dinucleotide                               | 2.5        |
| Pantothenate calcium salt                                         | 2          |
| Pyridoxal                                                         | 1          |
| Pyridoxamine dihydrochloride                                      | 1          |
| Riboflavin                                                        | 1.6        |
| Thiamine hydrochloride                                            | 1          |
| Vitamine B <sub>12</sub>                                          | 0.1        |
| Glucose                                                           | 10,000     |
| Adenine                                                           | 20         |
| Guanine                                                           | 20         |
| Uracil                                                            | 20         |
| CaCl <sub>2</sub> ·2H <sub>2</sub> O                              | 20         |
| NaC <sub>2</sub> H <sub>3</sub> O <sub>2</sub> ·3H <sub>2</sub> O | 2,720      |
| NaHCO <sub>3</sub>                                                | 2,500      |
| NaH <sub>2</sub> PO <sub>4</sub> ·H <sub>2</sub> O                | 3,200      |
| Na <sub>2</sub> HPO <sub>4</sub> ·2H <sub>2</sub> O               | 9,220      |
| C <sub>5</sub> H <sub>14</sub> NOCl (Choline)                     | 20         |

Table S2. Primers used in this study

| Oligonucleotide                   | Sequence (5'-3')                          |                                                |
|-----------------------------------|-------------------------------------------|------------------------------------------------|
| <b>Mutagenesis of <i>codY</i></b> |                                           |                                                |
| PCR of <i>codY</i> and 5'+3'      |                                           |                                                |
| codYfwd                           | CAAGACCCAGATAGCCTTCC                      |                                                |
| codYrev                           | CAGCTGGTTTAAACAATCTCG                     |                                                |
| PCR with plasmid pG619            |                                           |                                                |
| codY_revinv                       | TAGCGTTGTAAGGGATCCCATCCTGCAACTG           |                                                |
| codY_fwdinv                       | GAAGTGAAGAAAA <u>AAGCTT</u> ACTAATGACAAAG |                                                |
| PCR of <i>ermB</i> gene           |                                           |                                                |
| Eryfor-Clal                       | <u>ATCGAT</u> ACGGTTCGTGTTCGTGCTG         |                                                |
| Eryrev-Clal                       | <u>ATCGAT</u> CGTAGGCGCTAGGGACCTC         |                                                |
| <b>Mutagenesis of <i>zwf</i></b>  |                                           |                                                |
| PCR of <i>zwf</i> and 5'+3'       |                                           |                                                |
| zwffwd                            | GTTGATGACTAAGGAAGAAG                      |                                                |
| zwfrev                            | GATACCTTCCGTGCGGGTGC                      |                                                |
| <b>RT-PCR</b>                     |                                           |                                                |
| <i>zwf</i>                        | ZwfRTf<br>ZwfRTr                          | TGCGAGTGGAGACCTGGCTA<br>AATCATTGACATCATGGCTT   |
| <i>ilvB</i>                       | IlvBRTf<br>IlvBRTTr                       | GGTCGGACCTAGTTTTGGAA<br>CCTTCAGCTTCATGCAAACA   |
| <i>ilvE</i>                       | IlvERTf<br>IlvERTTr                       | ATGGACAATGGGATCAAGGA<br>GACGGTCACATGTACGTTGC   |
| <i>glyA</i>                       | GlyARTf<br>GlyARTTr                       | TGGAATGCTATTGCCAAAGA<br>TTCCTGAATGTGGTTGGACA   |
| <i>ppc</i>                        | PpcRTf<br>PpcRTr                          | AAACGCGCTAAGTTGTACCG<br>TCCTGCGTTGATAATTCCTTCA |
| <i>aroC</i>                       | AroCRTf<br>AroCRTTr                       | CAGCTGGACTTCCATTGACA<br>GCCATTCTGGTGGTCCCTTA   |
| <i>aspC</i>                       | AspCRTf<br>AspCRTTr                       | GCACTGAAGGCTGAGGGTAG<br>ATAGCCGTAAAAGCGCTCAA   |
| <i>codY</i>                       | CodYRTf<br>CodYRTr                        | CAGAGGAGCAGTTGCAGGAT<br>GCCCCTTGAACGTAGTCATC   |
| <i>pavA</i>                       | PavARTf<br>PavARTTr                       | ATGGTCGCATCCAGAAAATC<br>ACGGTCATTTTCCACTTGCT   |
| <i>eno</i>                        | EnoRTf<br>EnoRTr                          | CTCGTTACGGTGGTCTTGCT<br>GTAGTCAGCAGCAGCACGAG   |

Restriction sites *Bam*HI, *Hind*III, and *Cl*aI, respectively, are underlined

Table S3.  $^{13}\text{C}$ -excess (mol%) of amino acids in experiments with *S. pneumoniae* D39 $\Delta$ *cps* cultured with 55.5 mM [U- $^{13}\text{C}_6$ ]glucose. M represents the mass of the unlabeled amino acid under study. The number behind the mass represents the number of  $^{13}\text{C}$ -atoms. The data are mean values of three measurements.

|     |     | <i>Streptococcus pneumoniae</i> D39 $\Delta$ <i>cps</i> |                      |                      |
|-----|-----|---------------------------------------------------------|----------------------|----------------------|
|     |     | 55.5 mM [U- $^{13}\text{C}_6$ ]Glc                      |                      |                      |
|     |     | CDM 1                                                   | CDM 2                | CDM 3                |
| Ala | M+0 | 6.00 % $\pm$ 0.04 %                                     | 7.27 % $\pm$ 0.09 %  | 16.34 % $\pm$ 0.04 % |
|     | M+1 | 0.40 % $\pm$ 0.02 %                                     | 0.75 % $\pm$ 0.02 %  | 0.95 % $\pm$ 0.01 %  |
|     | M+2 | 2.98 % $\pm$ 0.04 %                                     | 1.78 % $\pm$ 0.05 %  | 1.82 % $\pm$ 0.01 %  |
|     | M+3 | 90.62 % $\pm$ 0.07 %                                    | 90.20 % $\pm$ 0.12 % | 80.89 % $\pm$ 0.03 % |
| Asp | M+0 | 49.14 % $\pm$ 0.08 %                                    | 57.25 % $\pm$ 0.05 % | 69.36 % $\pm$ 0.05 % |
|     | M+1 | 0.00 % $\pm$ 0.00 %                                     | 0.06 % $\pm$ 0.08 %  | 0.11 % $\pm$ 0.09 %  |
|     | M+2 | 1.19 % $\pm$ 0.07 %                                     | 0.68 % $\pm$ 0.02 %  | 0.60 % $\pm$ 0.12 %  |
|     | M+3 | 48.23 % $\pm$ 0.35 %                                    | 40.52 % $\pm$ 0.08 % | 29.60 % $\pm$ 0.05 % |
|     | M+4 | 1.43 % $\pm$ 0.25 %                                     | 1.48 % $\pm$ 0.11 %  | 0.33 % $\pm$ 0.07 %  |
| Glu | M+0 | 99.52 % $\pm$ 0.17 %                                    | 99.24 % $\pm$ 0.09 % | 99.90 % $\pm$ 0.02 % |
|     | M+1 | 0.00 % $\pm$ 0.00 %                                     | 0.58 % $\pm$ 0.09 %  | 0.00 % $\pm$ 0.00 %  |
|     | M+2 | 0.43 % $\pm$ 0.17 %                                     | 0.17 % $\pm$ 0.00 %  | 0.00 % $\pm$ 0.00 %  |
|     | M+3 | 0.00 % $\pm$ 0.00 %                                     | 0.00 % $\pm$ 0.00 %  | 0.07 % $\pm$ 0.02 %  |
|     | M+4 | 0.00 % $\pm$ 0.00 %                                     | 0.00 % $\pm$ 0.00 %  | 0.01 % $\pm$ 0.01 %  |
|     | M+5 | 0.05 % $\pm$ 0.00 %                                     | 0.01 % $\pm$ 0.01 %  | 0.01 % $\pm$ 0.01 %  |
| Gly | M+0 | 98.44 % $\pm$ 0.07 %                                    | 99.17 % $\pm$ 0.11 % | 94.01 % $\pm$ 0.14 % |
|     | M+1 | 0.43 % $\pm$ 0.05 %                                     | 0.03 % $\pm$ 0.03 %  | 0.00 % $\pm$ 0.00 %  |
|     | M+2 | 1.13 % $\pm$ 0.11 %                                     | 0.80 % $\pm$ 0.09 %  | 5.99 % $\pm$ 0.14 %  |
| Ile | M+0 | 99.96 % $\pm$ 0.05 %                                    | 99.62 % $\pm$ 0.05 % | 99.94 % $\pm$ 0.02 % |
|     | M+1 | 0.00 % $\pm$ 0.00 %                                     | 0.15 % $\pm$ 0.04 %  | 0.00 % $\pm$ 0.00 %  |
|     | M+2 | 0.04 % $\pm$ 0.05 %                                     | 0.20 % $\pm$ 0.02 %  | 0.02 % $\pm$ 0.03 %  |
|     | M+3 | 0.00 % $\pm$ 0.00 %                                     | 0.00 % $\pm$ 0.00 %  | 0.01 % $\pm$ 0.01 %  |
|     | M+4 | 0.00 % $\pm$ 0.00 %                                     | 0.02 % $\pm$ 0.02 %  | 0.02 % $\pm$ 0.00 %  |
|     | M+5 | 0.00 % $\pm$ 0.00 %                                     | 0.00 % $\pm$ 0.01 %  | 0.02 % $\pm$ 0.00 %  |
| Leu | M+0 | 99.74 % $\pm$ 0.01 %                                    | 99.78 % $\pm$ 0.16 % | 99.99 % $\pm$ 0.01 % |
|     | M+1 | 0.00 % $\pm$ 0.00 %                                     | 0.22 % $\pm$ 0.16 %  | 0.00 % $\pm$ 0.00 %  |
|     | M+2 | 0.23 % $\pm$ 0.00 %                                     | 0.00 % $\pm$ 0.01 %  | 0.00 % $\pm$ 0.00 %  |
|     | M+3 | 0.02 % $\pm$ 0.00 %                                     | 0.00 % $\pm$ 0.00 %  | 0.00 % $\pm$ 0.00 %  |
|     | M+4 | 0.01 % $\pm$ 0.00 %                                     | 0.00 % $\pm$ 0.00 %  | 0.00 % $\pm$ 0.00 %  |
|     | M+5 | 0.01 % $\pm$ 0.01 %                                     | 0.00 % $\pm$ 0.00 %  | 0.01 % $\pm$ 0.01 %  |
| Phe | M+0 | 94.95 % $\pm$ 0.21 %                                    | 97.88 % $\pm$ 0.30 % | 97.57 % $\pm$ 0.06 % |
|     | M+1 | 2.04 % $\pm$ 0.31 %                                     | 0.00 % $\pm$ 0.00 %  | 0.01 % $\pm$ 0.02 %  |
|     | M+2 | 0.00 % $\pm$ 0.00 %                                     | 0.00 % $\pm$ 0.00 %  | 0.10 % $\pm$ 0.10 %  |
|     | M+3 | 0.00 % $\pm$ 0.00 %                                     | 0.02 % $\pm$ 0.04 %  | 0.05 % $\pm$ 0.06 %  |
|     | M+4 | 0.10 % $\pm$ 0.04 %                                     | 0.00 % $\pm$ 0.01 %  | 0.01 % $\pm$ 0.02 %  |
|     | M+5 | 0.00 % $\pm$ 0.01 %                                     | 0.01 % $\pm$ 0.02 %  | 0.10 % $\pm$ 0.05 %  |
|     | M+6 | 0.00 % $\pm$ 0.00 %                                     | 0.00 % $\pm$ 0.01 %  | 0.11 % $\pm$ 0.08 %  |
|     | M+7 | 0.00 % $\pm$ 0.00 %                                     | 0.01 % $\pm$ 0.02 %  | 0.09 % $\pm$ 0.08 %  |
|     | M+8 | 0.19 % $\pm$ 0.03 %                                     | 0.08 % $\pm$ 0.05 %  | 0.11 % $\pm$ 0.04 %  |
|     | M+9 | 2.71 % $\pm$ 0.10 %                                     | 1.99 % $\pm$ 0.28 %  | 1.84 % $\pm$ 0.06 %  |

|     |     |                  |                  |                  |
|-----|-----|------------------|------------------|------------------|
| Pro | M+0 | 99.65 % ± 0.43 % | 98.81 % ± 0.08 % | 99.08 % ± 0.28 % |
|     | M+1 | 0.21 % ± 0.27 %  | 0.23 % ± 0.14 %  | 0.48 % ± 0.23 %  |
|     | M+2 | 0.00 % ± 0.00 %  | 0.22 % ± 0.03 %  | 0.27 % ± 0.41 %  |
|     | M+3 | 0.05 % ± 0.01 %  | 0.00 % ± 0.00 %  | 0.00 % ± 0.00 %  |
|     | M+4 | 0.09 % ± 0.15 %  | 0.64 % ± 0.14 %  | 0.18 % ± 0.07 %  |
|     | M+5 | 0.01 % ± 0.01 %  | 0.10 % ± 0.05 %  | 0.00 % ± 0.00 %  |
| Ser | M+0 | 35.16 % ± 0.12 % | 15.31 % ± 0.08 % | 26.87 % ± 0.25 % |
|     | M+1 | 62.78 % ± 0.10 % | 81.90 % ± 0.31 % | 69.10 % ± 0.35 % |
|     | M+2 | 1.59 % ± 0.03 %  | 1.76 % ± 0.32 %  | 3.28 % ± 0.10 %  |
|     | M+3 | 0.47 % ± 0.10 %  | 1.03 % ± 0.10 %  | 0.75 % ± 0.01 %  |
| Thr | M+0 | 24.14 % ± 0.16 % | 41.52 % ± 6.48 % | 48.76 % ± 0.35 % |
|     | M+1 | 1.12 % ± 0.06 %  | 1.27 % ± 0.96 %  | 3.47 % ± 0.17 %  |
|     | M+2 | 1.48 % ± 0.09 %  | 1.32 % ± 0.42 %  | 1.77 % ± 0.07 %  |
|     | M+3 | 72.71 % ± 0.26 % | 54.04 % ± 2.83 % | 43.65 % ± 0.22 % |
|     | M+4 | 0.55 % ± 0.14 %  | 1.85 % ± 2.36 %  | 2.35 % ± 0.10 %  |
| Tyr | M+0 | 98.17 % ± 0.01 % | 98.45 % ± 0.14 % | 98.72 % ± 0.41 % |
|     | M+1 | 0.00 % ± 0.00 %  | 0.14 % ± 0.13 %  | 0.00 % ± 0.00 %  |
|     | M+2 | 0.00 % ± 0.00 %  | 0.03 % ± 0.05 %  | 0.05 % ± 0.07 %  |
|     | M+3 | 0.00 % ± 0.00 %  | 0.12 % ± 0.08 %  | 0.00 % ± 0.00 %  |
|     | M+4 | 0.00 % ± 0.00 %  | 0.00 % ± 0.00 %  | 0.15 % ± 0.25 %  |
|     | M+5 | 0.12 % ± 0.03 %  | 0.00 % ± 0.00 %  | 0.14 % ± 0.25 %  |
|     | M+6 | 0.00 % ± 0.00 %  | 0.04 % ± 0.04 %  | 0.15 % ± 0.27 %  |
|     | M+7 | 0.00 % ± 0.00 %  | 0.01 % ± 0.02 %  | 0.26 % ± 0.19 %  |
|     | M+8 | 0.16 % ± 0.10 %  | 0.09 % ± 0.09 %  | 0.07 % ± 0.08 %  |
|     | M+9 | 1.55 % ± 0.11 %  | 1.12 % ± 0.09 %  | 0.45 % ± 0.37 %  |
| Val | M+0 | 99.85 % ± 0.07 % | 98.60 % ± 0.21 % | 99.18 % ± 0.07 % |
|     | M+1 | 0.08 % ± 0.07 %  | 0.30 % ± 0.11 %  | 0.46 % ± 0.11 %  |
|     | M+2 | 0.05 % ± 0.04 %  | 0.20 % ± 0.03 %  | 0.19 % ± 0.05 %  |
|     | M+3 | 0.02 % ± 0.02 %  | 0.00 % ± 0.00 %  | 0.00 % ± 0.00 %  |
|     | M+4 | 0.00 % ± 0.00 %  | 0.18 % ± 0.13 %  | 0.16 % ± 0.02 %  |
|     | M+5 | 0.00 % ± 0.00 %  | 0.71 % ± 0.18 %  | 0.01 % ± 0.02 %  |

Table S4.  $^{13}\text{C}$ -excess (mol%) of amino acids in experiments with *S. pneumoniae* D39 $\Delta\text{cps}$  cultured in the presence of 1.33 mM  $[\text{U-}^{13}\text{C}_2]\text{glycine}$ . M represents the mass of the unlabeled amino acid under study. The number behind the mass represents the number of  $^{13}\text{C}$ -atoms. The data are mean values of three measurements.

|     |     | <i>Streptococcus pneumoniae</i> D39 $\Delta\text{cps}$ |                      |                      |
|-----|-----|--------------------------------------------------------|----------------------|----------------------|
|     |     | 1.33 mM $[\text{U-}^{13}\text{C}_2]\text{Gly}$         |                      |                      |
|     |     | CDM 1                                                  | CDM 2                | CDM 3                |
| Ala | M+0 | 99.83 % $\pm$ 0.10 %                                   | 99.90 % $\pm$ 0.01 % | 99.90 % $\pm$ 0.03 % |
|     | M+1 | 0.12 % $\pm$ 0.11 %                                    | 0.00 % $\pm$ 0.00 %  | 0.00 % $\pm$ 0.00 %  |
|     | M+2 | 0.03 % $\pm$ 0.04 %                                    | 0.00 % $\pm$ 0.00 %  | 0.02 % $\pm$ 0.03 %  |
|     | M+3 | 0.02 % $\pm$ 0.02 %                                    | 0.10 % $\pm$ 0.01 %  | 0.08 % $\pm$ 0.01 %  |
| Asp | M+0 | 99.91 % $\pm$ 0.08 %                                   | 99.98 % $\pm$ 0.02 % | 99.99 % $\pm$ 0.02 % |
|     | M+1 | 0.00 % $\pm$ 0.00 %                                    | 0.00 % $\pm$ 0.00 %  | 0.00 % $\pm$ 0.00 %  |
|     | M+2 | 0.08 % $\pm$ 0.07 %                                    | 0.00 % $\pm$ 0.00 %  | 0.00 % $\pm$ 0.00 %  |
|     | M+3 | 0.01 % $\pm$ 0.02 %                                    | 0.02 % $\pm$ 0.02 %  | 0.01 % $\pm$ 0.02 %  |
|     | M+4 | 0.00 % $\pm$ 0.00 %                                    | 0.00 % $\pm$ 0.00 %  | 0.00 % $\pm$ 0.00 %  |
| Glu | M+0 | 99.95 % $\pm$ 0.06 %                                   | 99.79 % $\pm$ 0.17 % | 99.79 % $\pm$ 0.14 % |
|     | M+1 | 0.03 % $\pm$ 0.05 %                                    | 0.11 % $\pm$ 0.17 %  | 0.03 % $\pm$ 0.03 %  |
|     | M+2 | 0.00 % $\pm$ 0.00 %                                    | 0.09 % $\pm$ 0.10 %  | 0.18 % $\pm$ 0.12 %  |
|     | M+3 | 0.02 % $\pm$ 0.02 %                                    | 0.01 % $\pm$ 0.02 %  | 0.00 % $\pm$ 0.00 %  |
|     | M+4 | 0.00 % $\pm$ 0.00 %                                    | 0.00 % $\pm$ 0.00 %  | 0.00 % $\pm$ 0.00 %  |
|     | M+5 | 0.00 % $\pm$ 0.00 %                                    | 0.00 % $\pm$ 0.00 %  | 0.01 % $\pm$ 0.01 %  |
| Gly | M+0 | 11.78 % $\pm$ 0.12 %                                   | 16.22 % $\pm$ 0.11 % | 14.41 % $\pm$ 0.03 % |
|     | M+1 | 1.95 % $\pm$ 0.03 %                                    | 2.00 % $\pm$ 0.07 %  | 2.08 % $\pm$ 0.03 %  |
|     | M+2 | 86.28 % $\pm$ 0.15 %                                   | 81.78 % $\pm$ 0.10 % | 83.51 % $\pm$ 0.03 % |
| Ile | M+0 | 99.98 % $\pm$ 0.02 %                                   | 99.84 % $\pm$ 0.02 % | 99.83 % $\pm$ 0.01 % |
|     | M+1 | 0.00 % $\pm$ 0.00 %                                    | 0.00 % $\pm$ 0.00 %  | 0.00 % $\pm$ 0.00 %  |
|     | M+2 | 0.02 % $\pm$ 0.02 %                                    | 0.16 % $\pm$ 0.01 %  | 0.17 % $\pm$ 0.01 %  |
|     | M+3 | 0.00 % $\pm$ 0.00 %                                    | 0.00 % $\pm$ 0.00 %  | 0.00 % $\pm$ 0.00 %  |
|     | M+4 | 0.00 % $\pm$ 0.00 %                                    | 0.00 % $\pm$ 0.00 %  | 0.00 % $\pm$ 0.00 %  |
|     | M+5 | 0.00 % $\pm$ 0.00 %                                    | 0.00 % $\pm$ 0.00 %  | 0.00 % $\pm$ 0.00 %  |
| Leu | M+0 | 99.83 % $\pm$ 0.28 %                                   | 99.95 % $\pm$ 0.01 % | 99.95 % $\pm$ 0.00 % |
|     | M+1 | 0.00 % $\pm$ 0.00 %                                    | 0.00 % $\pm$ 0.00 %  | 0.00 % $\pm$ 0.00 %  |
|     | M+2 | 0.16 % $\pm$ 0.28 %                                    | 0.00 % $\pm$ 0.00 %  | 0.00 % $\pm$ 0.00 %  |
|     | M+3 | 0.00 % $\pm$ 0.00 %                                    | 0.05 % $\pm$ 0.01 %  | 0.04 % $\pm$ 0.01 %  |
|     | M+4 | 0.00 % $\pm$ 0.01 %                                    | 0.00 % $\pm$ 0.00 %  | 0.01 % $\pm$ 0.01 %  |
|     | M+5 | 0.00 % $\pm$ 0.00 %                                    | 0.00 % $\pm$ 0.00 %  | 0.00 % $\pm$ 0.00 %  |
| Phe | M+0 | 99.82 % $\pm$ 0.10 %                                   | 99.75 % $\pm$ 0.15 % | 99.88 % $\pm$ 0.01 % |
|     | M+1 | 0.00 % $\pm$ 0.00 %                                    | 0.09 % $\pm$ 0.13 %  | 0.00 % $\pm$ 0.01 %  |
|     | M+2 | 0.16 % $\pm$ 0.11 %                                    | 0.02 % $\pm$ 0.03 %  | 0.00 % $\pm$ 0.00 %  |
|     | M+3 | 0.00 % $\pm$ 0.00 %                                    | 0.00 % $\pm$ 0.00 %  | 0.00 % $\pm$ 0.00 %  |
|     | M+4 | 0.00 % $\pm$ 0.00 %                                    | 0.10 % $\pm$ 0.01 %  | 0.11 % $\pm$ 0.02 %  |
|     | M+5 | 0.00 % $\pm$ 0.00 %                                    | 0.03 % $\pm$ 0.03 %  | 0.00 % $\pm$ 0.01 %  |
|     | M+6 | 0.02 % $\pm$ 0.00 %                                    | 0.00 % $\pm$ 0.00 %  | 0.00 % $\pm$ 0.00 %  |
|     | M+7 | 0.00 % $\pm$ 0.00 %                                    | 0.00 % $\pm$ 0.01 %  | 0.00 % $\pm$ 0.00 %  |
|     | M+8 | 0.00 % $\pm$ 0.00 %                                    | 0.00 % $\pm$ 0.00 %  | 0.00 % $\pm$ 0.00 %  |
|     | M+9 | 0.00 % $\pm$ 0.01 %                                    | 0.00 % $\pm$ 0.00 %  | 0.00 % $\pm$ 0.00 %  |
| Pro | M+0 | 98.94 % $\pm$ 0.15 %                                   | 99.29 % $\pm$ 0.27 % | 99.06 % $\pm$ 0.39 % |
|     | M+1 | 0.00 % $\pm$ 0.00 %                                    | 0.46 % $\pm$ 0.18 %  | 0.59 % $\pm$ 0.25 %  |
|     | M+2 | 0.63 % $\pm$ 0.11 %                                    | 0.00 % $\pm$ 0.00 %  | 0.00 % $\pm$ 0.00 %  |

|     |     |                  |                  |                  |
|-----|-----|------------------|------------------|------------------|
|     | M+3 | 0.00 % ± 0.01 %  | 0.13 % ± 0.03 %  | 0.24 % ± 0.12 %  |
|     | M+4 | 0.39 % ± 0.04 %  | 0.12 % ± 0.10 %  | 0.09 % ± 0.08 %  |
|     | M+5 | 0.03 % ± 0.04 %  | 0.00 % ± 0.00 %  | 0.02 % ± 0.03 %  |
| Ser | M+0 | 9.27 % ± 0.06 %  | 15.10 % ± 0.22 % | 11.96 % ± 0.05 % |
|     | M+1 | 1.54 % ± 0.11 %  | 1.56 % ± 0.11 %  | 1.47 % ± 0.16 %  |
|     | M+2 | 86.66 % ± 0.06 % | 81.96 % ± 0.24 % | 85.27 % ± 0.13 % |
|     | M+3 | 2.52 % ± 0.08 %  | 1.38 % ± 0.35 %  | 1.31 % ± 0.08 %  |
| Thr | M+0 | 93.32 % ± 0.43 % | 98.31 % ± 0.58 % | 98.42 % ± 0.38 % |
|     | M+1 | 4.06 % ± 0.79 %  | 1.22 % ± 0.14 %  | 1.27 % ± 0.45 %  |
|     | M+2 | 2.34 % ± 0.46 %  | 0.47 % ± 0.46 %  | 0.31 % ± 0.14 %  |
|     | M+3 | 0.00 % ± 0.00 %  | 0.00 % ± 0.00 %  | 0.00 % ± 0.00 %  |
|     | M+4 | 0.28 % ± 0.17 %  | 0.00 % ± 0.00 %  | 0.00 % ± 0.00 %  |
| Tyr | M+0 | 99.63 % ± 0.21 % | 99.62 % ± 0.28 % | 99.36 % ± 0.32 % |
|     | M+1 | 0.19 % ± 0.33 %  | 0.00 % ± 0.00 %  | 0.38 % ± 0.37 %  |
|     | M+2 | 0.00 % ± 0.00 %  | 0.19 % ± 0.19 %  | 0.14 % ± 0.08 %  |
|     | M+3 | 0.06 % ± 0.10 %  | 0.01 % ± 0.02 %  | 0.01 % ± 0.01 %  |
|     | M+4 | 0.00 % ± 0.00 %  | 0.00 % ± 0.00 %  | 0.00 % ± 0.00 %  |
|     | M+5 | 0.01 % ± 0.02 %  | 0.12 % ± 0.05 %  | 0.07 % ± 0.04 %  |
|     | M+6 | 0.04 % ± 0.07 %  | 0.00 % ± 0.00 %  | 0.02 % ± 0.03 %  |
|     | M+7 | 0.00 % ± 0.00 %  | 0.00 % ± 0.00 %  | 0.00 % ± 0.00 %  |
|     | M+8 | 0.03 % ± 0.03 %  | 0.04 % ± 0.07 %  | 0.02 % ± 0.03 %  |
|     | M+9 | 0.04 % ± 0.07 %  | 0.02 % ± 0.02 %  | 0.01 % ± 0.02 %  |
| Val | M+0 | 99.58 % ± 0.08 % | 99.95 % ± 0.06 % | 99.97 % ± 0.02 % |
|     | M+1 | 0.12 % ± 0.13 %  | 0.03 % ± 0.05 %  | 0.00 % ± 0.00 %  |
|     | M+2 | 0.10 % ± 0.05 %  | 0.01 % ± 0.02 %  | 0.00 % ± 0.00 %  |
|     | M+3 | 0.01 % ± 0.01 %  | 0.00 % ± 0.00 %  | 0.02 % ± 0.03 %  |
|     | M+4 | 0.18 % ± 0.03 %  | 0.00 % ± 0.00 %  | 0.00 % ± 0.01 %  |
|     | M+5 | 0.01 % ± 0.01 %  | 0.01 % ± 0.02 %  | 0.00 % ± 0.00 %  |

Table S5. <sup>13</sup>C-excess (mol%) of amino acids in experiments with *S. pneumoniae* D39Δ*cps* cultured with 27.8 mM [1,2-<sup>13</sup>C<sub>2</sub>]glucose. M represents the mass of the unlabeled amino acid under study. The number behind the mass represents the number of <sup>13</sup>C-atoms. The data are mean values of three measurements.

|     |     | <i>Streptococcus pneumoniae</i> D39Δ <i>cps</i> |                   |                  | D39Δ <i>cps</i> Δ <i>zwf</i>                    |
|-----|-----|-------------------------------------------------|-------------------|------------------|-------------------------------------------------|
|     |     | 27.8 mM [1,2- <sup>13</sup> C <sub>2</sub> ]Glc |                   |                  | 27.8 mM [1,2- <sup>13</sup> C <sub>2</sub> ]Glc |
|     |     | CDM 1                                           | CDM 2             | CDM 3            | CDM 1                                           |
| Ala | M+0 | 59.99 % ± 1.03 %                                | 59.99 % ± 0.09 %  | 60.91 % ± 0.05 % | 60.89 % ± 0.07 %                                |
|     | M+1 | 0.61 % ± 0.08 %                                 | 0.91 % ± 0.04 %   | 1.06 % ± 0.05 %  | 0.00 % ± 0.00 %                                 |
|     | M+2 | 31.69 % ± 0.51 %                                | 38.82 % ± 0.06 %  | 37.80 % ± 0.04 % | 38.91 % ± 0.07 %                                |
|     | M+3 | 7.71 % ± 1.52 %                                 | 0.28 % ± 0.02 %   | 0.23 % ± 0.03 %  | 0.20 % ± 0.03 %                                 |
| Asp | M+0 | 80.51 % ± 0.28 %                                | 78.92 % ± 0.94 %  | 56.92 % ± 0.04 % | 81.92 % ± 0.09 %                                |
|     | M+1 | 0.27 % ± 0.33 %                                 | 0.49 % ± 0.38 %   | 1.48 % ± 0.04 %  | 0.01 % ± 0.01 %                                 |
|     | M+2 | 15.09 % ± 0.36 %                                | 20.55 % ± 0.59 %  | 40.74 % ± 0.12 % | 17.90 % ± 0.20 %                                |
|     | M+3 | 3.96 % ± 0.76 %                                 | 0.04 % ± 0.04 %   | 0.86 % ± 0.06 %  | 0.17 % ± 0.11 %                                 |
|     | M+4 | 0.17 % ± 0.08 %                                 | 0.00 % ± 0.00 %   | 0.00 % ± 0.00 %  | 0.00 % ± 0.00 %                                 |
| Glu | M+0 | 99.38 % ± 0.18 %                                | 99.28 % ± 1.22 %  | 99.94 % ± 0.06 % | 99.75 % ± 0.10 %                                |
|     | M+1 | 0.47 % ± 0.11 %                                 | 0.21 % ± 0.37 %   | 0.00 % ± 0.00 %  | 0.00 % ± 0.00 %                                 |
|     | M+2 | 0.14 % ± 0.13 %                                 | 0.50 % ± 0.87 %   | 0.04 % ± 0.07 %  | 0.15 % ± 0.11 %                                 |
|     | M+3 | 0.00 % ± 0.00 %                                 | 0.00 % ± 0.00 %   | 0.02 % ± 0.03 %  | 0.03 % ± 0.03 %                                 |
|     | M+4 | 0.00 % ± 0.00 %                                 | 0.01 % ± 0.02 %   | 0.00 % ± 0.00 %  | 0.04 % ± 0.03 %                                 |
|     | M+5 | 0.00 % ± 0.00 %                                 | 0.00 % ± 0.00 %   | 0.00 % ± 0.00 %  | 0.03 % ± 0.02 %                                 |
| Gly | M+0 | 99.43 % ± 0.01 %                                | 99.84 % ± 0.10 %  | 99.84 % ± 0.08 % | 99.25 % ± 0.09 %                                |
|     | M+1 | 0.10 % ± 0.04 %                                 | 0.13 % ± 0.06 %   | 0.10 % ± 0.03 %  | 0.52 % ± 0.08 %                                 |
|     | M+2 | 0.47 % ± 0.04 %                                 | 0.03 % ± 0.03 %   | 0.06 % ± 0.05 %  | 0.23 % ± 0.01 %                                 |
| Ile | M+0 | 99.42 % ± 0.01 %                                | 99.17 % ± 0.93 %  | 99.83 % ± 0.01 % | 99.78 % ± 0.02 %                                |
|     | M+1 | 0.01 % ± 0.02 %                                 | 0.32 % ± 0.56 %   | 0.00 % ± 0.00 %  | 0.00 % ± 0.00 %                                 |
|     | M+2 | 0.22 % ± 0.03 %                                 | 0.50 % ± 0.39 %   | 0.17 % ± 0.01 %  | 0.21 % ± 0.01 %                                 |
|     | M+3 | 0.01 % ± 0.01 %                                 | 0.00 % ± 0.00 %   | 0.00 % ± 0.00 %  | 0.01 % ± 0.00 %                                 |
|     | M+4 | 0.01 % ± 0.00 %                                 | 0.00 % ± 0.00 %   | 0.00 % ± 0.00 %  | 0.00 % ± 0.00 %                                 |
|     | M+5 | 0.33 % ± 0.03 %                                 | 0.00 % ± 0.00 %   | 0.00 % ± 0.00 %  | 0.00 % ± 0.00 %                                 |
| Leu | M+0 | 99.91 % ± 0.07 %                                | 100.00 % ± 0.01 % | 99.94 % ± 0.02 % | 99.98 % ± 0.02 %                                |
|     | M+1 | 0.06 % ± 0.08 %                                 | 0.00 % ± 0.00 %   | 0.00 % ± 0.00 %  | 0.00 % ± 0.00 %                                 |
|     | M+2 | 0.01 % ± 0.01 %                                 | 0.00 % ± 0.00 %   | 0.00 % ± 0.00 %  | 0.00 % ± 0.01 %                                 |
|     | M+3 | 0.00 % ± 0.00 %                                 | 0.00 % ± 0.00 %   | 0.06 % ± 0.01 %  | 0.01 % ± 0.02 %                                 |
|     | M+4 | 0.00 % ± 0.01 %                                 | 0.00 % ± 0.00 %   | 0.00 % ± 0.00 %  | 0.00 % ± 0.00 %                                 |
|     | M+5 | 0.02 % ± 0.00 %                                 | 0.00 % ± 0.00 %   | 0.00 % ± 0.00 %  | 0.01 % ± 0.01 %                                 |
| Phe | M+0 | 97.83 % ± 0.29 %                                | 94.58 % ± 0.55 %  | 97.25 % ± 0.08 % | 94.90 % ± 0.07 %                                |
|     | M+1 | 0.00 % ± 0.00 %                                 | 0.00 % ± 0.00 %   | 0.03 % ± 0.04 %  | 0.54 % ± 0.09 %                                 |
|     | M+2 | 1.35 % ± 0.24 %                                 | 3.87 % ± 0.29 %   | 1.75 % ± 0.11 %  | 3.00 % ± 0.08 %                                 |
|     | M+3 | 0.05 % ± 0.07 %                                 | 0.09 % ± 0.12 %   | 0.00 % ± 0.00 %  | 0.02 % ± 0.03 %                                 |
|     | M+4 | 0.34 % ± 0.05 %                                 | 1.32 % ± 0.23 %   | 0.90 % ± 0.03 %  | 1.54 % ± 0.05 %                                 |
|     | M+5 | 0.08 % ± 0.03 %                                 | 0.04 % ± 0.02 %   | 0.06 % ± 0.02 %  | 0.00 % ± 0.00 %                                 |
|     | M+6 | 0.02 % ± 0.02 %                                 | 0.08 % ± 0.03 %   | 0.00 % ± 0.01 %  | 0.00 % ± 0.00 %                                 |
|     | M+7 | 0.02 % ± 0.04 %                                 | 0.01 % ± 0.01 %   | 0.00 % ± 0.00 %  | 0.00 % ± 0.00 %                                 |
|     | M+8 | 0.05 % ± 0.05 %                                 | 0.00 % ± 0.00 %   | 0.00 % ± 0.00 %  | 0.00 % ± 0.00 %                                 |
|     | M+9 | 0.25 % ± 0.02 %                                 | 0.01 % ± 0.01 %   | 0.00 % ± 0.00 %  | 0.00 % ± 0.00 %                                 |
| Pro | M+0 | 98.80 % ± 0.27 %                                | 98.70 % ± 0.37 %  | 99.36 % ± 0.15 % | 100.00 % ± 0.00 %                               |

|     |     |                  |                  |                  |                  |
|-----|-----|------------------|------------------|------------------|------------------|
|     | M+1 | 0.00 % ± 0.00 %  | 0.00 % ± 0.00 %  | 0.30 % ± 0.06 %  | 0.00 % ± 0.00 %  |
|     | M+2 | 0.29 % ± 0.05 %  | 0.51 % ± 0.14 %  | 0.00 % ± 0.00 %  | 0.00 % ± 0.00 %  |
|     | M+3 | 0.05 % ± 0.05 %  | 0.00 % ± 0.01 %  | 0.21 % ± 0.18 %  | 0.00 % ± 0.00 %  |
|     | M+4 | 0.80 % ± 0.24 %  | 0.67 % ± 0.20 %  | 0.13 % ± 0.12 %  | 0.00 % ± 0.00 %  |
|     | M+5 | 0.06 % ± 0.07 %  | 0.11 % ± 0.05 %  | 0.00 % ± 0.00 %  | 0.00 % ± 0.00 %  |
| Ser | M+0 | 91.30 % ± 1.47 % | 96.86 % ± 0.39 % | 99.02 % ± 0.42 % | 99.76 % ± 0.02 % |
|     | M+1 | 8.55 % ± 1.46 %  | 2.73 % ± 0.36 %  | 0.88 % ± 0.44 %  | 0.00 % ± 0.00 %  |
|     | M+2 | 0.08 % ± 0.08 %  | 0.41 % ± 0.24 %  | 0.03 % ± 0.04 %  | 0.00 % ± 0.00 %  |
|     | M+3 | 0.07 % ± 0.09 %  | 0.00 % ± 0.00 %  | 0.06 % ± 0.06 %  | 0.24 % ± 0.02 %  |
| Thr | M+0 | 66.45 % ± 0.63 % | 65.67 % ± 0.52 % | 61.84 % ± 0.22 % | 70.97 % ± 0.17 % |
|     | M+1 | 4.41 % ± 0.26 %  | 3.44 % ± 0.77 %  | 2.07 % ± 0.25 %  | 1.69 % ± 0.20 %  |
|     | M+2 | 20.40 % ± 0.73 % | 28.85 % ± 0.87 % | 35.05 % ± 0.16 % | 27.27 % ± 0.15 % |
|     | M+3 | 7.65 % ± 1.19 %  | 1.02 % ± 0.11 %  | 1.03 % ± 0.19 %  | 0.08 % ± 0.10 %  |
|     | M+4 | 1.09 % ± 0.11 %  | 1.01 % ± 0.08 %  | 0.00 % ± 0.00 %  | 0.00 % ± 0.00 %  |
| Tyr | M+0 | 98.69 % ± 0.48 % | 97.75 % ± 1.58 % | 98.24 % ± 0.26 % | 98.92 % ± 0.12 % |
|     | M+1 | 0.00 % ± 0.00 %  | 1.12 % ± 1.94 %  | 0.31 % ± 0.34 %  | 0.00 % ± 0.00 %  |
|     | M+2 | 0.63 % ± 0.33 %  | 0.49 % ± 0.24 %  | 1.06 % ± 0.15 %  | 0.56 % ± 0.18 %  |
|     | M+3 | 0.07 % ± 0.01 %  | 0.17 % ± 0.15 %  | 0.02 % ± 0.04 %  | 0.05 % ± 0.05 %  |
|     | M+4 | 0.09 % ± 0.10 %  | 0.43 % ± 0.02 %  | 0.17 % ± 0.06 %  | 0.31 % ± 0.02 %  |
|     | M+5 | 0.02 % ± 0.03 %  | 0.01 % ± 0.01 %  | 0.11 % ± 0.09 %  | 0.12 % ± 0.03 %  |
|     | M+6 | 0.05 % ± 0.09 %  | 0.00 % ± 0.00 %  | 0.02 % ± 0.02 %  | 0.02 % ± 0.03 %  |
|     | M+7 | 0.04 % ± 0.07 %  | 0.01 % ± 0.02 %  | 0.00 % ± 0.00 %  | 0.00 % ± 0.00 %  |
|     | M+8 | 0.18 % ± 0.19 %  | 0.00 % ± 0.00 %  | 0.02 % ± 0.03 %  | 0.00 % ± 0.00 %  |
|     | M+9 | 0.23 % ± 0.03 %  | 0.02 % ± 0.03 %  | 0.05 % ± 0.05 %  | 0.02 % ± 0.03 %  |
| Val | M+0 | 99.62 % ± 0.15 % | 99.63 % ± 0.08 % | 99.92 % ± 0.13 % | 99.86 % ± 0.14 % |
|     | M+1 | 0.14 % ± 0.14 %  | 0.09 % ± 0.06 %  | 0.05 % ± 0.09 %  | 0.04 % ± 0.07 %  |
|     | M+2 | 0.15 % ± 0.03 %  | 0.09 % ± 0.05 %  | 0.00 % ± 0.00 %  | 0.02 % ± 0.04 %  |
|     | M+3 | 0.00 % ± 0.00 %  | 0.00 % ± 0.00 %  | 0.00 % ± 0.00 %  | 0.01 % ± 0.01 %  |
|     | M+4 | 0.06 % ± 0.02 %  | 0.19 % ± 0.00 %  | 0.01 % ± 0.02 %  | 0.03 % ± 0.04 %  |
|     | M+5 | 0.03 % ± 0.03 %  | 0.00 % ± 0.00 %  | 0.01 % ± 0.01 %  | 0.03 % ± 0.04 %  |



Table S6.  $^{13}\text{C}$ -excess (mol%) of amino acids in experiments with *S. pneumoniae* D39 $\Delta\text{cps}\Delta\text{pavA}$  cultivated in CDM with 55.5 mM [ $\text{U-}^{13}\text{C}_6$ ]glucose. M represents the mass of the unlabeled amino acid under study. The number behind the mass represents the number of  $^{13}\text{C}$ -atoms. The data are mean values of three measurements.

|     |                     | <i>Streptococcus pneumoniae</i> D39 $\Delta\text{cps}\Delta\text{pavA}$ |                       |                       |
|-----|---------------------|-------------------------------------------------------------------------|-----------------------|-----------------------|
|     |                     | 55.5 mM [ $\text{U-}^{13}\text{C}_6$ ]Glc                               |                       |                       |
|     |                     | CDM 1                                                                   | CDM 2                 | CDM 3                 |
| Ala | M+0                 | 16.79 % $\pm$ 0.15 %                                                    | 18.29 % $\pm$ 0.05 %  | 17.06 % $\pm$ 0.16 %  |
|     | M+1                 | 0.95 % $\pm$ 0.02 %                                                     | 0.90 % $\pm$ 0.01 %   | 0.97 % $\pm$ 0.03 %   |
|     | M+2                 | 1.74 % $\pm$ 0.01 %                                                     | 1.80 % $\pm$ 0.01 %   | 1.84 % $\pm$ 0.02 %   |
|     | M+3                 | 80.52 % $\pm$ 0.15 %                                                    | 79.01 % $\pm$ 0.06 %  | 80.13 % $\pm$ 0.19 %  |
| Asp | M+0                 | 65.87 % $\pm$ 0.09 %                                                    | 71.16 % $\pm$ 0.16 %  | 70.53 % $\pm$ 0.40 %  |
|     | M+1                 | 0.06 % $\pm$ 0.06 %                                                     | 0.08 % $\pm$ 0.07 %   | 0.21 % $\pm$ 0.19 %   |
|     | M+2                 | 0.45 % $\pm$ 0.09 %                                                     | 0.52 % $\pm$ 0.02 %   | 0.54 % $\pm$ 0.03 %   |
|     | M+3                 | 33.40 % $\pm$ 0.07 %                                                    | 27.52 % $\pm$ 0.13 %  | 28.36 % $\pm$ 0.20 %  |
|     | M+4                 | 0.22 % $\pm$ 0.06 %                                                     | 0.71 % $\pm$ 0.03 %   | 0.36 % $\pm$ 0.10 %   |
| Glu | M+0                 | 99.56 % $\pm$ 0.22 %                                                    | 99.80 % $\pm$ 0.16 %  | 99.56 % $\pm$ 0.18 %  |
|     | M+1                 | 0.34 % $\pm$ 0.29 %                                                     | 0.12 % $\pm$ 0.16 %   | 0.32 % $\pm$ 0.29 %   |
|     | M+2                 | 0.06 % $\pm$ 0.05 %                                                     | 0.06 % $\pm$ 0.06 %   | 0.07 % $\pm$ 0.12 %   |
|     | M+3                 | 0.02 % $\pm$ 0.03 %                                                     | 0.00 % $\pm$ 0.01 %   | 0.01 % $\pm$ 0.02 %   |
|     | M+4                 | 0.00 % $\pm$ 0.00 %                                                     | 0.00 % $\pm$ 0.00 %   | 0.01 % $\pm$ 0.01 %   |
|     | M+5                 | 0.02 % $\pm$ 0.01 %                                                     | 0.02 % $\pm$ 0.01 %   | 0.02 % $\pm$ 0.00 %   |
| Gly | M+0                 | 99.40 % $\pm$ 0.03 %                                                    | 98.79 % $\pm$ 0.04 %  | 94.80 % $\pm$ 0.17 %  |
|     | M+1                 | 0.00 % $\pm$ 0.00 %                                                     | 0.00 % $\pm$ 0.00 %   | 0.01 % $\pm$ 0.01 %   |
|     | M+2                 | 0.60 % $\pm$ 0.03 %                                                     | 1.21 % $\pm$ 0.04 %   | 5.19 % $\pm$ 0.15 %   |
| Ile | M+0                 | 99.89 % $\pm$ 0.05 %                                                    | 99.95 % $\pm$ 0.03 %  | 99.81 % $\pm$ 0.21 %  |
|     | M+1                 | 0.00 % $\pm$ 0.00 %                                                     | 0.00 % $\pm$ 0.00 %   | 0.00 % $\pm$ 0.00 %   |
|     | M+2                 | 0.02 % $\pm$ 0.01 %                                                     | 0.05 % $\pm$ 0.03 %   | 0.00 % $\pm$ 0.00 %   |
|     | M+3                 | 0.03 % $\pm$ 0.04 %                                                     | 0.00 % $\pm$ 0.00 %   | 0.02 % $\pm$ 0.03 %   |
|     | M+4                 | 0.05 % $\pm$ 0.05 %                                                     | 0.00 % $\pm$ 0.00 %   | 0.02 % $\pm$ 0.02 %   |
|     | M+5                 | 0.02 % $\pm$ 0.01 %                                                     | 0.00 % $\pm$ 0.00 %   | 0.14 % $\pm$ 0.20 %   |
| Leu | M+0                 | 99.98 % $\pm$ 0.02 %                                                    | 100.00 % $\pm$ 0.00 % | 100.00 % $\pm$ 0.00 % |
|     | M+1                 | 0.00 % $\pm$ 0.00 %                                                     | 0.00 % $\pm$ 0.00 %   | 0.00 % $\pm$ 0.00 %   |
|     | M+2                 | 0.00 % $\pm$ 0.00 %                                                     | 0.00 % $\pm$ 0.00 %   | 0.00 % $\pm$ 0.00 %   |
|     | M+3                 | 0.01 % $\pm$ 0.01 %                                                     | 0.00 % $\pm$ 0.00 %   | 0.00 % $\pm$ 0.00 %   |
|     | M+4                 | 0.00 % $\pm$ 0.00 %                                                     | 0.00 % $\pm$ 0.00 %   | 0.00 % $\pm$ 0.00 %   |
|     | M+5                 | 0.01 % $\pm$ 0.01 %                                                     | 0.00 % $\pm$ 0.00 %   | 0.00 % $\pm$ 0.00 %   |
| Phe | M+0                 | 95.34 % $\pm$ 0.24 %                                                    | 96.99 % $\pm$ 0.11 %  | 97.47 % $\pm$ 0.22 %  |
|     | M+1                 | 0.08 % $\pm$ 0.14 %                                                     | 0.00 % $\pm$ 0.00 %   | 0.05 % $\pm$ 0.08 %   |
|     | M+2                 | 0.09 % $\pm$ 0.08 %                                                     | 0.07 % $\pm$ 0.07 %   | 0.21 % $\pm$ 0.20 %   |
|     | M+3                 | 0.02 % $\pm$ 0.03 %                                                     | 0.02 % $\pm$ 0.03 %   | 0.08 % $\pm$ 0.13 %   |
|     | M+4                 | 0.04 % $\pm$ 0.07 %                                                     | 0.05 % $\pm$ 0.07 %   | 0.02 % $\pm$ 0.03 %   |
|     | M+5                 | 0.22 % $\pm$ 0.08 %                                                     | 0.11 % $\pm$ 0.07 %   | 0.06 % $\pm$ 0.02 %   |
|     | M+6                 | 0.36 % $\pm$ 0.13 %                                                     | 0.19 % $\pm$ 0.07 %   | 0.08 % $\pm$ 0.08 %   |
|     | M+7                 | 0.15 % $\pm$ 0.07 %                                                     | 0.20 % $\pm$ 0.07 %   | 0.18 % $\pm$ 0.16 %   |
|     | M+8                 | 0.21 % $\pm$ 0.08 %                                                     | 0.16 % $\pm$ 0.01 %   | 0.12 % $\pm$ 0.09 %   |
| M+9 | 3.49 % $\pm$ 0.15 % | 2.20 % $\pm$ 0.05 %                                                     | 1.73 % $\pm$ 0.02 %   |                       |

|     |     |                  |                  |                  |
|-----|-----|------------------|------------------|------------------|
| Pro | M+0 | 99.00 % ± 0.19 % | 98.69 % ± 0.13 % | 99.16 % ± 0.18 % |
|     | M+1 | 0.55 % ± 0.05 %  | 0.26 % ± 0.10 %  | 0.36 % ± 0.30 %  |
|     | M+2 | 0.26 % ± 0.22 %  | 0.59 % ± 0.12 %  | 0.27 % ± 0.19 %  |
|     | M+3 | 0.00 % ± 0.01 %  | 0.00 % ± 0.00 %  | 0.00 % ± 0.00 %  |
|     | M+4 | 0.15 % ± 0.13 %  | 0.46 % ± 0.16 %  | 0.18 % ± 0.05 %  |
|     | M+5 | 0.04 % ± 0.05 %  | 0.00 % ± 0.00 %  | 0.03 % ± 0.04 %  |
| Ser | M+0 | 32.82 % ± 0.36 % | 33.05 % ± 0.20 % | 28.21 % ± 0.31 % |
|     | M+1 | 63.65 % ± 0.49 % | 63.68 % ± 0.29 % | 68.11 % ± 0.36 % |
|     | M+2 | 2.79 % ± 0.18 %  | 2.63 % ± 0.15 %  | 2.91 % ± 0.03 %  |
|     | M+3 | 0.73 % ± 0.05 %  | 0.63 % ± 0.06 %  | 0.77 % ± 0.12 %  |
| Thr | M+0 | 44.36 % ± 0.33 % | 52.52 % ± 0.08 % | 50.32 % ± 0.54 % |
|     | M+1 | 3.31 % ± 0.18 %  | 3.56 % ± 0.06 %  | 3.63 % ± 0.14 %  |
|     | M+2 | 1.57 % ± 0.30 %  | 1.80 % ± 0.18 %  | 1.76 % ± 0.04 %  |
|     | M+3 | 47.50 % ± 0.50 % | 39.53 % ± 0.20 % | 41.96 % ± 0.38 % |
|     | M+4 | 3.27 % ± 0.14 %  | 2.60 % ± 0.05 %  | 2.32 % ± 0.06 %  |
| Tyr | M+0 | 97.74 % ± 0.81 % | 98.51 % ± 0.36 % | 97.70 % ± 0.74 % |
|     | M+1 | 0.20 % ± 0.35 %  | 0.32 % ± 0.31 %  | 0.29 % ± 0.51 %  |
|     | M+2 | 0.00 % ± 0.00 %  | 0.02 % ± 0.04 %  | 0.09 % ± 0.15 %  |
|     | M+3 | 0.14 % ± 0.12 %  | 0.01 % ± 0.02 %  | 0.41 % ± 0.26 %  |
|     | M+4 | 0.02 % ± 0.01 %  | 0.00 % ± 0.00 %  | 0.12 % ± 0.20 %  |
|     | M+5 | 0.00 % ± 0.00 %  | 0.03 % ± 0.05 %  | 0.47 % ± 0.33 %  |
|     | M+6 | 0.22 % ± 0.19 %  | 0.08 % ± 0.07 %  | 0.14 % ± 0.16 %  |
|     | M+7 | 0.16 % ± 0.15 %  | 0.15 % ± 0.16 %  | 0.05 % ± 0.08 %  |
|     | M+8 | 0.23 % ± 0.24 %  | 0.06 % ± 0.08 %  | 0.15 % ± 0.21 %  |
|     | M+9 | 1.28 % ± 0.40 %  | 0.82 % ± 0.05 %  | 0.58 % ± 0.09 %  |
| Val | M+0 | 99.51 % ± 0.25 % | 99.19 % ± 0.09 % | 99.20 % ± 0.22 % |
|     | M+1 | 0.27 % ± 0.24 %  | 0.42 % ± 0.08 %  | 0.43 % ± 0.17 %  |
|     | M+2 | 0.15 % ± 0.03 %  | 0.20 % ± 0.03 %  | 0.21 % ± 0.07 %  |
|     | M+3 | 0.00 % ± 0.00 %  | 0.00 % ± 0.00 %  | 0.00 % ± 0.00 %  |
|     | M+4 | 0.06 % ± 0.02 %  | 0.18 % ± 0.04 %  | 0.16 % ± 0.03 %  |
|     | M+5 | 0.01 % ± 0.01 %  | 0.00 % ± 0.00 %  | 0.00 % ± 0.00 %  |

Table S7.  $^{13}\text{C}$ -excess (mol%) of amino acids in experiments with *S. pneumoniae* D39 $\Delta\text{cps}\Delta\text{codY}$  cultivated in CDM with 55.5 mM [ $\text{U-}^{13}\text{C}_6$ ]glucose. M represents the mass of the unlabeled amino acid under study. The number behind the mass represents the number of  $^{13}\text{C}$ -atoms. The data are mean values of three measurements.

|     |                     | <i>Streptococcus pneumoniae</i> D39 $\Delta\text{cps}\Delta\text{codY}$ |                      |                       |
|-----|---------------------|-------------------------------------------------------------------------|----------------------|-----------------------|
|     |                     | 55.5 mM [ $\text{U-}^{13}\text{C}_6$ ]Glc                               |                      |                       |
|     |                     | CDM 1                                                                   | CDM 2                | CDM 3                 |
| Ala | M+0                 | 19.46 % $\pm$ 0.05 %                                                    | 17.81 % $\pm$ 0.06 % | 17.53 % $\pm$ 0.06 %  |
|     | M+1                 | 0.66 % $\pm$ 0.01 %                                                     | 1.09 % $\pm$ 0.02 %  | 0.46 % $\pm$ 0.04 %   |
|     | M+2                 | 2.54 % $\pm$ 0.01 %                                                     | 2.60 % $\pm$ 0.01 %  | 2.59 % $\pm$ 0.03 %   |
|     | M+3                 | 77.35 % $\pm$ 0.06 %                                                    | 78.49 % $\pm$ 0.08 % | 79.43 % $\pm$ 0.13 %  |
| Asp | M+0                 | 58.78 % $\pm$ 0.67 %                                                    | 52.24 % $\pm$ 1.64 % | 50.76 % $\pm$ 0.48 %  |
|     | M+1                 | 0.18 % $\pm$ 0.18 %                                                     | 1.99 % $\pm$ 0.32 %  | 0.00 % $\pm$ 0.00 %   |
|     | M+2                 | 1.23 % $\pm$ 0.04 %                                                     | 0.98 % $\pm$ 0.75 %  | 1.55 % $\pm$ 0.08 %   |
|     | M+3                 | 39.38 % $\pm$ 0.53 %                                                    | 43.46 % $\pm$ 1.32 % | 47.21 % $\pm$ 0.47 %  |
|     | M+4                 | 0.42 % $\pm$ 0.13 %                                                     | 1.32 % $\pm$ 0.75 %  | 0.49 % $\pm$ 0.27 %   |
| Glu | M+0                 | 99.76 % $\pm$ 0.20 %                                                    | 94.84 % $\pm$ 0.40 % | 99.96 % $\pm$ 0.04 %  |
|     | M+1                 | 0.13 % $\pm$ 0.14 %                                                     | 5.15 % $\pm$ 0.40 %  | 0.00 % $\pm$ 0.00 %   |
|     | M+2                 | 0.09 % $\pm$ 0.11 %                                                     | 0.00 % $\pm$ 0.00 %  | 0.00 % $\pm$ 0.01 %   |
|     | M+3                 | 0.02 % $\pm$ 0.03 %                                                     | 0.00 % $\pm$ 0.01 %  | 0.03 % $\pm$ 0.05 %   |
|     | M+4                 | 0.00 % $\pm$ 0.00 %                                                     | 0.00 % $\pm$ 0.00 %  | 0.00 % $\pm$ 0.00 %   |
|     | M+5                 | 0.00 % $\pm$ 0.00 %                                                     | 0.00 % $\pm$ 0.00 %  | 0.00 % $\pm$ 0.00 %   |
| Gly | M+0                 | 78.69 % $\pm$ 1.87 %                                                    | 97.63 % $\pm$ 0.03 % | 99.54 % $\pm$ 0.19 %  |
|     | M+1                 | 0.66 % $\pm$ 0.06 %                                                     | 2.04 % $\pm$ 0.05 %  | 0.06 % $\pm$ 0.07 %   |
|     | M+2                 | 20.65 % $\pm$ 1.81 %                                                    | 0.33 % $\pm$ 0.02 %  | 0.40 % $\pm$ 0.12 %   |
| Ile | M+0                 | 99.79 % $\pm$ 0.03 %                                                    | 94.75 % $\pm$ 0.63 % | 99.74 % $\pm$ 0.04 %  |
|     | M+1                 | 0.00 % $\pm$ 0.00 %                                                     | 4.85 % $\pm$ 0.42 %  | 0.00 % $\pm$ 0.00 %   |
|     | M+2                 | 0.02 % $\pm$ 0.02 %                                                     | 0.32 % $\pm$ 0.20 %  | 0.13 % $\pm$ 0.03 %   |
|     | M+3                 | 0.01 % $\pm$ 0.03 %                                                     | 0.00 % $\pm$ 0.00 %  | 0.00 % $\pm$ 0.00 %   |
|     | M+4                 | 0.09 % $\pm$ 0.01 %                                                     | 0.09 % $\pm$ 0.03 %  | 0.12 % $\pm$ 0.01 %   |
|     | M+5                 | 0.09 % $\pm$ 0.02 %                                                     | 0.00 % $\pm$ 0.00 %  | 0.00 % $\pm$ 0.00 %   |
| Leu | M+0                 | 99.99 % $\pm$ 0.00 %                                                    | 95.14 % $\pm$ 0.13 % | 100.00 % $\pm$ 0.00 % |
|     | M+1                 | 0.00 % $\pm$ 0.00 %                                                     | 4.82 % $\pm$ 0.09 %  | 0.00 % $\pm$ 0.00 %   |
|     | M+2                 | 0.00 % $\pm$ 0.00 %                                                     | 0.03 % $\pm$ 0.04 %  | 0.00 % $\pm$ 0.00 %   |
|     | M+3                 | 0.00 % $\pm$ 0.00 %                                                     | 0.01 % $\pm$ 0.02 %  | 0.00 % $\pm$ 0.00 %   |
|     | M+4                 | 0.00 % $\pm$ 0.01 %                                                     | 0.00 % $\pm$ 0.00 %  | 0.00 % $\pm$ 0.00 %   |
|     | M+5                 | 0.01 % $\pm$ 0.01 %                                                     | 0.00 % $\pm$ 0.00 %  | 0.00 % $\pm$ 0.00 %   |
| Phe | M+0                 | 98.89 % $\pm$ 0.11 %                                                    | 89.65 % $\pm$ 0.58 % | 97.33 % $\pm$ 0.26 %  |
|     | M+1                 | 0.00 % $\pm$ 0.00 %                                                     | 7.32 % $\pm$ 0.73 %  | 0.00 % $\pm$ 0.00 %   |
|     | M+2                 | 0.08 % $\pm$ 0.15 %                                                     | 0.63 % $\pm$ 0.04 %  | 0.37 % $\pm$ 0.20 %   |
|     | M+3                 | 0.07 % $\pm$ 0.11 %                                                     | 0.00 % $\pm$ 0.00 %  | 0.02 % $\pm$ 0.03 %   |
|     | M+4                 | 0.03 % $\pm$ 0.03 %                                                     | 0.02 % $\pm$ 0.02 %  | 0.03 % $\pm$ 0.05 %   |
|     | M+5                 | 0.11 % $\pm$ 0.03 %                                                     | 0.11 % $\pm$ 0.02 %  | 0.10 % $\pm$ 0.01 %   |
|     | M+6                 | 0.04 % $\pm$ 0.08 %                                                     | 0.17 % $\pm$ 0.02 %  | 0.11 % $\pm$ 0.02 %   |
|     | M+7                 | 0.09 % $\pm$ 0.11 %                                                     | 0.11 % $\pm$ 0.02 %  | 0.11 % $\pm$ 0.03 %   |
|     | M+8                 | 0.02 % $\pm$ 0.04 %                                                     | 0.16 % $\pm$ 0.03 %  | 0.15 % $\pm$ 0.04 %   |
| M+9 | 0.67 % $\pm$ 0.21 % | 1.81 % $\pm$ 0.12 %                                                     | 1.79 % $\pm$ 0.11 %  |                       |

|     |                 |                  |                  |                  |
|-----|-----------------|------------------|------------------|------------------|
| Pro | M+0             | 99.50 % ± 0.33 % | 93.81 % ± 0.19 % | 99.02 % ± 0.46 % |
|     | M+1             | 0.09 % ± 0.08 %  | 5.00 % ± 0.15 %  | 0.10 % ± 0.17 %  |
|     | M+2             | 0.18 % ± 0.21 %  | 0.72 % ± 0.17 %  | 0.63 % ± 0.22 %  |
|     | M+3             | 0.00 % ± 0.00 %  | 0.04 % ± 0.06 %  | 0.10 % ± 0.03 %  |
|     | M+4             | 0.22 % ± 0.11 %  | 0.39 % ± 0.02 %  | 0.13 % ± 0.12 %  |
|     | M+5             | 0.00 % ± 0.00 %  | 0.04 % ± 0.06 %  | 0.03 % ± 0.05 %  |
| Ser | M+0             | 35.63 % ± 0.20 % | 27.57 % ± 0.19 % | 23.92 % ± 0.38 % |
|     | M+1             | 60.79 % ± 0.52 % | 67.96 % ± 0.19 % | 72.83 % ± 0.86 % |
|     | M+2             | 2.77 % ± 0.25 %  | 3.63 % ± 0.06 %  | 2.48 % ± 0.24 %  |
|     | M+3             | 0.81 % ± 0.13 %  | 0.84 % ± 0.04 %  | 0.77 % ± 0.35 %  |
| Thr | M+0             | 34.64 % ± 0.34 % | 37.17 % ± 0.39 % | 33.25 % ± 0.38 % |
|     | M+1             | 2.41 % ± 0.24 %  | 3.54 % ± 0.09 %  | 2.06 % ± 0.73 %  |
|     | M+2             | 2.48 % ± 0.13 %  | 2.81 % ± 0.14 %  | 2.95 % ± 0.22 %  |
|     | M+3             | 57.47 % ± 0.21 % | 52.87 % ± 0.08 % | 58.77 % ± 1.64 % |
|     | M+4             | 3.00 % ± 0.13 %  | 3.61 % ± 0.26 %  | 2.98 % ± 0.59 %  |
| Tyr | M+0             | 98.41 % ± 0.63 % | 89.70 % ± 1.12 % | 97.31 % ± 1.18 % |
|     | M+1             | 0.12 % ± 0.11 %  | 9.15 % ± 0.75 %  | 1.10 % ± 1.02 %  |
|     | M+2             | 0.31 % ± 0.42 %  | 0.21 % ± 0.37 %  | 0.00 % ± 0.00 %  |
|     | M+3             | 0.20 % ± 0.23 %  | 0.03 % ± 0.05 %  | 0.11 % ± 0.14 %  |
|     | M+4             | 0.20 % ± 0.20 %  | 0.00 % ± 0.00 %  | 0.03 % ± 0.06 %  |
|     | M+5             | 0.11 % ± 0.17 %  | 0.00 % ± 0.00 %  | 0.20 % ± 0.18 %  |
|     | M+6             | 0.03 % ± 0.04 %  | 0.07 % ± 0.05 %  | 0.03 % ± 0.05 %  |
|     | M+7             | 0.14 % ± 0.14 %  | 0.06 % ± 0.02 %  | 0.14 % ± 0.13 %  |
|     | M+8             | 0.03 % ± 0.05 %  | 0.04 % ± 0.02 %  | 0.00 % ± 0.00 %  |
| M+9 | 0.45 % ± 0.15 % | 0.74 % ± 0.11 %  | 1.08 % ± 0.22 %  |                  |
| Val | M+0             | 98.90 % ± 0.06 % | 93.82 % ± 0.12 % | 99.37 % ± 0.11 % |
|     | M+1             | 0.64 % ± 0.06 %  | 5.54 % ± 0.12 %  | 0.26 % ± 0.03 %  |
|     | M+2             | 0.26 % ± 0.05 %  | 0.32 % ± 0.08 %  | 0.07 % ± 0.06 %  |
|     | M+3             | 0.00 % ± 0.00 %  | 0.01 % ± 0.01 %  | 0.00 % ± 0.00 %  |
|     | M+4             | 0.17 % ± 0.04 %  | 0.18 % ± 0.02 %  | 0.21 % ± 0.09 %  |
|     | M+5             | 0.03 % ± 0.01 %  | 0.14 % ± 0.00 %  | 0.09 % ± 0.04 %  |

Table S8.  $^{13}\text{C}$ -excess (mol%) of amino acids in experiments with *S. pneumoniae* D39 $\Delta\text{cps}\Delta\text{zwf}$  cultivated in CDM with 55.5 mM [ $\text{U-}^{13}\text{C}_6$ ]glucose. M represents the mass of the unlabeled amino acid under study. The number behind the mass represents the number of  $^{13}\text{C}$ -atoms. The data are mean values of three measurements.

|     |                     | <i>Streptococcus pneumoniae</i> D39 $\Delta\text{cps}\Delta\text{zwf}$ |                      |                      |
|-----|---------------------|------------------------------------------------------------------------|----------------------|----------------------|
|     |                     | 55.5 mM [ $\text{U-}^{13}\text{C}_6$ ]Glc                              |                      |                      |
|     |                     | CDM 1                                                                  | CDM 2                | CDM 3                |
| Ala | M+0                 | 16.11 % $\pm$ 0.03 %                                                   | 16.51 % $\pm$ 0.10 % | 16.85 % $\pm$ 0.07 % |
|     | M+1                 | 0.87 % $\pm$ 0.04 %                                                    | 0.94 % $\pm$ 0.01 %  | 1.02 % $\pm$ 0.01 %  |
|     | M+2                 | 2.71 % $\pm$ 0.03 %                                                    | 2.75 % $\pm$ 0.03 %  | 2.80 % $\pm$ 0.01 %  |
|     | M+3                 | 80.31 % $\pm$ 0.03 %                                                   | 79.80 % $\pm$ 0.12 % | 79.34 % $\pm$ 0.07 % |
| Asp | M+0                 | 63.89 % $\pm$ 0.23 %                                                   | 62.75 % $\pm$ 0.09 % | 62.46 % $\pm$ 0.44 % |
|     | M+1                 | 0.06 % $\pm$ 0.06 %                                                    | 0.08 % $\pm$ 0.14 %  | 0.18 % $\pm$ 0.16 %  |
|     | M+2                 | 0.88 % $\pm$ 0.06 %                                                    | 0.83 % $\pm$ 0.18 %  | 0.96 % $\pm$ 0.04 %  |
|     | M+3                 | 35.10 % $\pm$ 0.42 %                                                   | 36.33 % $\pm$ 0.13 % | 36.32 % $\pm$ 0.26 % |
|     | M+4                 | 0.07 % $\pm$ 0.12 %                                                    | 0.01 % $\pm$ 0.01 %  | 0.08 % $\pm$ 0.04 %  |
| Glu | M+0                 | 99.80 % $\pm$ 0.21 %                                                   | 99.90 % $\pm$ 0.04 % | 99.95 % $\pm$ 0.03 % |
|     | M+1                 | 0.00 % $\pm$ 0.00 %                                                    | 0.00 % $\pm$ 0.00 %  | 0.00 % $\pm$ 0.00 %  |
|     | M+2                 | 0.16 % $\pm$ 0.22 %                                                    | 0.00 % $\pm$ 0.00 %  | 0.00 % $\pm$ 0.00 %  |
|     | M+3                 | 0.02 % $\pm$ 0.01 %                                                    | 0.02 % $\pm$ 0.03 %  | 0.02 % $\pm$ 0.04 %  |
|     | M+4                 | 0.00 % $\pm$ 0.00 %                                                    | 0.00 % $\pm$ 0.00 %  | 0.00 % $\pm$ 0.00 %  |
|     | M+5                 | 0.02 % $\pm$ 0.01 %                                                    | 0.08 % $\pm$ 0.02 %  | 0.03 % $\pm$ 0.01 %  |
| Gly | M+0                 | 99.27 % $\pm$ 0.02 %                                                   | 98.97 % $\pm$ 0.05 % | 97.43 % $\pm$ 0.11 % |
|     | M+1                 | 0.05 % $\pm$ 0.06 %                                                    | 0.15 % $\pm$ 0.04 %  | 0.73 % $\pm$ 0.06 %  |
|     | M+2                 | 0.68 % $\pm$ 0.07 %                                                    | 0.89 % $\pm$ 0.02 %  | 1.84 % $\pm$ 0.08 %  |
| Ile | M+0                 | 99.79 % $\pm$ 0.03 %                                                   | 99.73 % $\pm$ 0.02 % | 99.76 % $\pm$ 0.02 % |
|     | M+1                 | 0.00 % $\pm$ 0.00 %                                                    | 0.00 % $\pm$ 0.00 %  | 0.00 % $\pm$ 0.00 %  |
|     | M+2                 | 0.19 % $\pm$ 0.03 %                                                    | 0.24 % $\pm$ 0.03 %  | 0.22 % $\pm$ 0.01 %  |
|     | M+3                 | 0.02 % $\pm$ 0.01 %                                                    | 0.01 % $\pm$ 0.01 %  | 0.01 % $\pm$ 0.01 %  |
|     | M+4                 | 0.01 % $\pm$ 0.00 %                                                    | 0.02 % $\pm$ 0.01 %  | 0.01 % $\pm$ 0.00 %  |
|     | M+5                 | 0.00 % $\pm$ 0.00 %                                                    | 0.01 % $\pm$ 0.01 %  | 0.01 % $\pm$ 0.01 %  |
| Leu | M+0                 | 99.95 % $\pm$ 0.02 %                                                   | 99.98 % $\pm$ 0.01 % | 99.96 % $\pm$ 0.03 % |
|     | M+1                 | 0.00 % $\pm$ 0.00 %                                                    | 0.00 % $\pm$ 0.00 %  | 0.00 % $\pm$ 0.00 %  |
|     | M+2                 | 0.05 % $\pm$ 0.02 %                                                    | 0.00 % $\pm$ 0.00 %  | 0.04 % $\pm$ 0.03 %  |
|     | M+3                 | 0.00 % $\pm$ 0.00 %                                                    | 0.01 % $\pm$ 0.01 %  | 0.00 % $\pm$ 0.00 %  |
|     | M+4                 | 0.00 % $\pm$ 0.00 %                                                    | 0.00 % $\pm$ 0.00 %  | 0.00 % $\pm$ 0.00 %  |
|     | M+5                 | 0.00 % $\pm$ 0.00 %                                                    | 0.00 % $\pm$ 0.00 %  | 0.01 % $\pm$ 0.01 %  |
| Phe | M+0                 | 93.41 % $\pm$ 0.11 %                                                   | 90.76 % $\pm$ 0.86 % | 91.48 % $\pm$ 0.46 % |
|     | M+1                 | 0.55 % $\pm$ 0.27 %                                                    | 1.13 % $\pm$ 0.81 %  | 0.94 % $\pm$ 0.37 %  |
|     | M+2                 | 0.00 % $\pm$ 0.00 %                                                    | 0.00 % $\pm$ 0.00 %  | 0.00 % $\pm$ 0.00 %  |
|     | M+3                 | 0.03 % $\pm$ 0.04 %                                                    | 0.07 % $\pm$ 0.12 %  | 0.10 % $\pm$ 0.09 %  |
|     | M+4                 | 0.17 % $\pm$ 0.05 %                                                    | 0.23 % $\pm$ 0.11 %  | 0.28 % $\pm$ 0.11 %  |
|     | M+5                 | 0.36 % $\pm$ 0.07 %                                                    | 0.49 % $\pm$ 0.03 %  | 0.06 % $\pm$ 0.05 %  |
|     | M+6                 | 0.31 % $\pm$ 0.03 %                                                    | 0.46 % $\pm$ 0.09 %  | 0.45 % $\pm$ 0.15 %  |
|     | M+7                 | 0.39 % $\pm$ 0.04 %                                                    | 0.71 % $\pm$ 0.21 %  | 0.61 % $\pm$ 0.09 %  |
|     | M+8                 | 0.37 % $\pm$ 0.03 %                                                    | 0.41 % $\pm$ 0.03 %  | 0.45 % $\pm$ 0.09 %  |
| M+9 | 4.42 % $\pm$ 0.08 % | 5.74 % $\pm$ 0.22 %                                                    | 5.64 % $\pm$ 0.19 %  |                      |

|     |     |                   |                  |                   |
|-----|-----|-------------------|------------------|-------------------|
| Pro | M+0 | 100.00 % ± 0.00 % | 99.78 % ± 0.38 % | 100.00 % ± 0.00 % |
|     | M+1 | 0.00 % ± 0.00 %   | 0.00 % ± 0.00 %  | 0.00 % ± 0.00 %   |
|     | M+2 | 0.00 % ± 0.00 %   | 0.00 % ± 0.00 %  | 0.00 % ± 0.00 %   |
|     | M+3 | 0.00 % ± 0.00 %   | 0.00 % ± 0.00 %  | 0.00 % ± 0.00 %   |
|     | M+4 | 0.00 % ± 0.00 %   | 0.18 % ± 0.31 %  | 0.00 % ± 0.00 %   |
|     | M+5 | 0.00 % ± 0.00 %   | 0.04 % ± 0.07 %  | 0.00 % ± 0.00 %   |
| Ser | M+0 | 25.49 % ± 0.14 %  | 24.99 % ± 0.57 % | 25.25 % ± 0.21 %  |
|     | M+1 | 73.72 % ± 0.05 %  | 74.18 % ± 0.69 % | 74.03 % ± 0.31 %  |
|     | M+2 | 0.29 % ± 0.18 %   | 0.81 % ± 0.49 %  | 0.53 % ± 0.06 %   |
|     | M+3 | 0.50 % ± 0.05 %   | 0.03 % ± 0.05 %  | 0.20 % ± 0.09 %   |
| Thr | M+0 | 40.36 % ± 0.82 %  | 39.12 % ± 0.86 % | 39.54 % ± 0.54 %  |
|     | M+1 | 1.56 % ± 1.00 %   | 1.89 % ± 1.29 %  | 1.78 % ± 0.68 %   |
|     | M+2 | 2.30 % ± 0.41 %   | 1.23 % ± 0.69 %  | 2.02 % ± 0.31 %   |
|     | M+3 | 55.78 % ± 0.58 %  | 57.63 % ± 0.36 % | 56.33 % ± 0.51 %  |
|     | M+4 | 0.00 % ± 0.00 %   | 0.14 % ± 0.15 %  | 0.34 % ± 0.32 %   |
| Tyr | M+0 | 98.28 % ± 0.17 %  | 97.32 % ± 0.25 % | 98.04 % ± 0.17 %  |
|     | M+1 | 0.00 % ± 0.00 %   | 0.20 % ± 0.35 %  | 0.03 % ± 0.05 %   |
|     | M+2 | 0.11 % ± 0.11 %   | 0.13 % ± 0.22 %  | 0.04 % ± 0.06 %   |
|     | M+3 | 0.00 % ± 0.00 %   | 0.16 % ± 0.28 %  | 0.00 % ± 0.00 %   |
|     | M+4 | 0.00 % ± 0.00 %   | 0.03 % ± 0.05 %  | 0.00 % ± 0.00 %   |
|     | M+5 | 0.20 % ± 0.06 %   | 0.28 % ± 0.25 %  | 0.21 % ± 0.15 %   |
|     | M+6 | 0.07 % ± 0.03 %   | 0.16 % ± 0.17 %  | 0.14 % ± 0.18 %   |
|     | M+7 | 0.07 % ± 0.12 %   | 0.00 % ± 0.00 %  | 0.04 % ± 0.04 %   |
|     | M+8 | 0.05 % ± 0.06 %   | 0.17 % ± 0.08 %  | 0.15 % ± 0.13 %   |
| Val | M+0 | 99.13 % ± 0.14 %  | 99.72 % ± 0.07 % | 99.63 % ± 0.05 %  |
|     | M+1 | 0.52 % ± 0.08 %   | 0.00 % ± 0.00 %  | 0.00 % ± 0.00 %   |
|     | M+2 | 0.15 % ± 0.08 %   | 0.00 % ± 0.00 %  | 0.00 % ± 0.00 %   |
|     | M+3 | 0.01 % ± 0.01 %   | 0.03 % ± 0.05 %  | 0.06 % ± 0.01 %   |
|     | M+4 | 0.00 % ± 0.00 %   | 0.02 % ± 0.03 %  | 0.06 % ± 0.05 %   |
|     | M+5 | 0.19 % ± 0.02 %   | 0.23 % ± 0.03 %  | 0.25 % ± 0.03 %   |
